# Supplementary material for: Maximizing active site utilization in carbocatalysts for high-performance oxygen reduction reactions and zinc–air battery-powered capacitive deionization
Source: Royal Society of Chemistry journal article supplement (doi:10.1039/d4ta03422h), 2024-01-01

TEM image of NPC-Na:

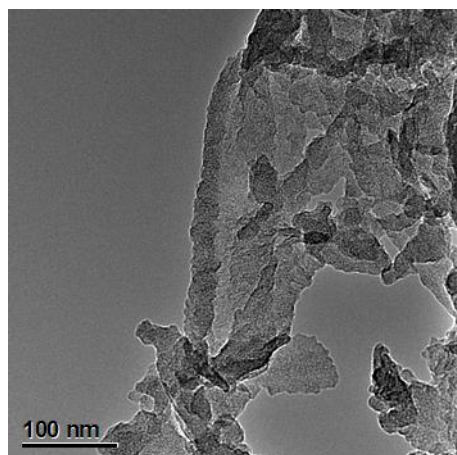

TEM image of NPC:

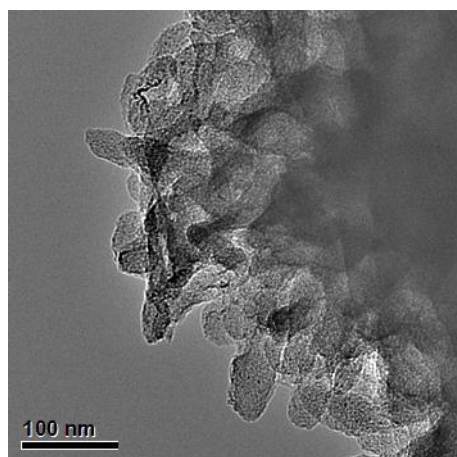

TEM image of NPC-Fe:

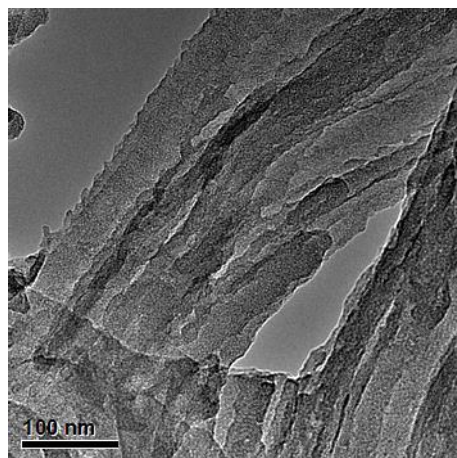

TEM image of NPC-Zn:

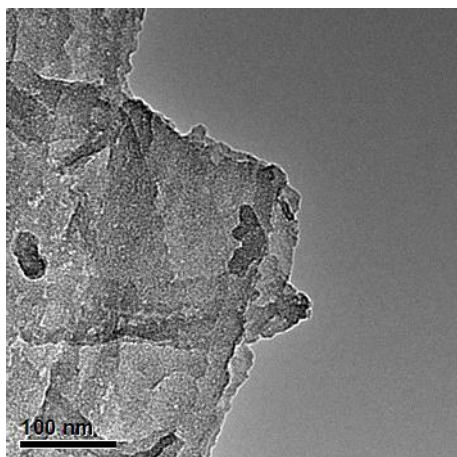

Aberration-corrected TEM image of NPC-Zn:

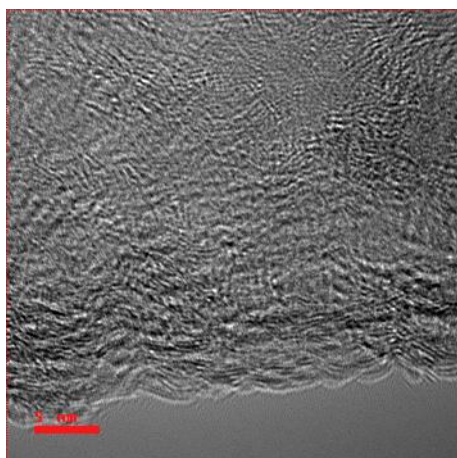

Supplement: d4ta03422h1.pdf [file d4ta03422h1.pdf]
